# Supplementary material for: Induced application of biological waste Escherichia coli functionalized with an amine-based polymer for CO2capture
Source: Royal Society of Chemistry journal article supplement (doi:10.1039/c6ra16280k), 2016-01-01
Supplement: c6ra16280k1.pdf [file c6ra16280k1.pdf]

## Supplementary Information

### Induced application of biological waste *Escherichia coli* functionalized with amine-based polymer for CO<sub>2</sub> capture

Vishwanath Hiremath,<sup>a,†</sup> Soonchul Kwon,<sup>b,†</sup> Soonha Hwang,<sup>a</sup> Min Cho,<sup>c,\*</sup> Jeong Gil Seo<sup>a,\*</sup>

**Table S1.** Comparison of different samples for CO<sub>2</sub> sorption.

| Adsorbent                  | Ads. Temp (°C) <sup>a</sup> | CO <sub>2</sub> capacity (mmol/g) | Amine eff. (molCO <sub>2</sub> mol <sup>-1</sup> N) <sup>c</sup> | Ref          |
|----------------------------|-----------------------------|-----------------------------------|------------------------------------------------------------------|--------------|
| DMAP-SBA-15                | 60                          | 0.05                              | 0.03                                                             | 1            |
| HNTs-NH <sub>2</sub>       | 25                          | 0.13                              | -                                                                | 2            |
| MAP-SBA-15                 | 60                          | 0.25                              | 0.13                                                             | 1            |
| AEAPS-SBA-15               | 60                          | 0.26                              | 0.10                                                             | 1            |
| cl-pyr-MCM-48              | 25                          | 0.30                              | 0.20                                                             | 3            |
| cl-PEI-MCM-48              | 25                          | 0.40                              | 0.08                                                             | 3            |
| Davison 62-NH <sub>2</sub> | 27                          | 0.41                              | 0.32                                                             | 4            |
| DT-HMS                     | 75                          | 0.45                              | 0.10                                                             | 5            |
| EDA-SBA-15                 | 22                          | 0.57                              | 0.22                                                             | 6            |
| AEAPS-SBA-16               | 60                          | 0.59                              | 0.23                                                             | 7            |
| SBA-15/G0                  | 20                          | 0.98                              | 0.41                                                             | 8            |
| PEI/ <i>E. coli</i>        | 25                          | 0.40                              | 0.93                                                             | Current work |
| PEI/ <i>E. coli</i>        | 75                          | 0.31                              | 0.69                                                             | Current work |

#### References:

- 1 N. Hiyoshi, K. Yogo and T. Yashima, *Microporous Mesoporous Mater.*, 2005, **84**, 357–365.
- 2 S. Jana, S. Das, C. Ghosh, A. Maity and M. Pradhan, *Sci. Rep.*, 2015, **5**, 1–8.
- 3 V. Zelenak, D. Halamova, L. Gaberova, E. Bloch and P. Llewellyn, *Microporous Mesoporous Mater.*, 2008, **116**, 358–364.
- 4 O. Leal, C. Bolívar, C. Ovalles, J. J. García and Y. Espidel, *Inorganica Chim. Acta*, 1995,

- 240**, 183–189.
- 5 G. P. Knowles, S. W. Delaney and A. L. Chaffee, *Ind. Eng. Chem. Res.*, 2006, **45**, 2626–2633.
  - 6 F. Zheng, D. N. Tran, B. J. Busche, G. E. Fryxell, R. S. Addleman, T. S. Zemanian and C. L. Aardahl, *Ind. Eng. Chem. Res.*, 2005, **44**, 3099–3105.
  - 7 J. Wei, J. Shi, H. Pan, W. Zhao, Q. Ye and Y. Shi, *Microporous Mesoporous Mater.*, 2008, **116**, 394–399.
  - 8 Z. Liang, B. Fadhel, C. J. Schneider and A. L. Chaffee, *Microporous Mesoporous Mater.*, 2008, **111**, 536–543.
